# Supplementary material
Source: MDPI journal article supplement (https://www.mdpi.com/2073-4395/13/6/1490)
Supplement: s1 [file s1]

**Table S1.** List of tested mustard cultivars as biofumigants with antifungal activity against *B. cinerea*.

| Mustard Cultivar | Mycelial Inhibition Ratio | Standard Deviation |
|------------------|---------------------------|--------------------|
| Dilong-1         | 90.40%                    | 2.80%              |
| Jing-6           | 86.94%                    | 2.76%              |
| Huangyou-7       | 66.55%                    | 1.31%              |
| Wuxuan           | 64.37%                    | 2.86%              |
| Mianyang         | 63.16%                    | 1.82%              |
| Tiancui-1        | 59.31%                    | 0.98%              |
| Gaoyou-9         | 55.91%                    | 4.72%              |
| Chaozhou-11      | 53.48%                    | 1.50%              |
| 15C166-1         | 50.60%                    | 1.03%              |
| Huang-3B1        | 50.10%                    | 1.37%              |
| Sichuan          | 47.68%                    | 1.63%              |
| Banye            | 47.20%                    | 3.22%              |
| Tiancui-321      | 46.70%                    | 2.84%              |
| Caijin           | 45.26%                    | 2.18%              |
| Zhenmei          | 45.26%                    | 2.18%              |
| Erdaomei         | 44.75%                    | 2.05%              |
| Xiang            | 44.75%                    | 2.05%              |
| Huaying          | 42.86%                    | 2.93%              |
| Shiman           | 42.83%                    | 1.58%              |
| Bianha-361       | 41.37%                    | 0.94%              |
| Juanxin          | 40.41%                    | 1.36%              |
| GE318            | 39.91%                    | 1.59%              |
| R005             | 37.51%                    | 1.67%              |
| Shoujie          | 37.49%                    | 1.67%              |
| Big-1            | 37.01%                    | 2.10%              |
| Mianyang-2       | 36.03%                    | 1.62%              |
| Jinyou-12        | 34.88%                    | 1.80%              |
| Changfeng        | 34.59%                    | 2.72%              |
| Gansu            | 34.11%                    | 1.59%              |
| Xizang-311       | 33.63%                    | 0.94%              |
| Juan-2           | 33.13%                    | 1.61%              |
| GE216            | 32.65%                    | 2.36%              |
| 15C165-1         | 32.65%                    | 1.36%              |
| GE320            | 32.16%                    | 2.53%              |
| Sichuan-2        | 32.16%                    | 2.53%              |
| Guangtou         | 31.68%                    | 1.70%              |
| Qingpielan       | 31.68%                    | 1.70%              |
| Xiaoyou          | 31.49%                    | 2.11%              |
| Denlong-3D1      | 31.20%                    | 0.87%              |
| Xizang-81        | 31.20%                    | 1.61%              |
| Shuijing         | 30.70%                    | 1.46%              |
| Xiangjie         | 29.26%                    | 1.62%              |
| Zijie            | 28.28%                    | 1.68%              |
| 17C150           | 28.25%                    | 3.34%              |
| Wuwangnong       | 27.80%                    | 1.05%              |
| Zhong            | 27.39%                    | 4.54%              |
| Daye             | 27.32%                    | 2.12%              |
| Weiyuan          | 27.32%                    | 0.89%              |
| Fangzheng        | 26.33%                    | 2.98%              |

---

|             |        |       |
|-------------|--------|-------|
| Huang-1     | 25.86% | 1.07% |
| 15C167-1    | 25.86% | 1.73% |
| Runshi      | 25.67% | 3.06% |
| ercai       | 25.28% | 3.57% |
| Wenjie      | 23.94% | 0.87% |
| Nongwang    | 23.43% | 1.79% |
| Jing-8      | 23.43% | 1.79% |
| Shuidong    | 22.95% | 1.55% |
| 15C163-1    | 22.89% | 8.05% |
| Chongjie    | 22.89% | 8.16% |
| Tiancui-3   | 21.96% | 3.15% |
| Lao-1       | 21.02% | 1.38% |
| Guantou-1   | 20.99% | 2.62% |
| Xizang-97   | 19.57% | 0.95% |
| Neimeng     | 19.06% | 3.27% |
| Huabian-351 | 18.89% | 2.53% |
| Shennong    | 17.58% | 4.26% |
| 8L-435      | 15.16% | 3.96% |
| Huang-2     | 15.00% | 1.41% |
| Siji        | 14.74% | 1.36% |
| Lao-2       | 14.71% | 1.79% |
| Dahe        | 14.22% | 2.44% |
| Gada        | 13.75% | 0.99% |
| Hongye      | 13.75% | 0.99% |
| Xinyou-9    | 13.26% | 1.66% |
| Daping      | 13.24% | 2.72% |
| Baihua      | 12.77% | 2.64% |
| Xizang-183  | 12.29% | 1.20% |
| Jingtai     | 11.80% | 2.73% |
| Daxin       | 11.33% | 1.41% |
| Baoxin      | 10.84% | 1.82% |
| Qingtian    | 9.86%  | 2.75% |
| Mengbao     | 9.86%  | 1.96% |
| Guangtou-2  | 9.39%  | 0.90% |
| Guangtou-3  | 8.91%  | 0.79% |
| GE217       | 7.94%  | 1.04% |
| Kejia       | 6.45%  | 3.36% |
| Zhengxing   | 5.52%  | 1.43% |
| Cuinen      | 4.53%  | 3.47% |
| Ping        | 4.03%  | 3.31% |
| Lagen       | 3.56%  | 2.24% |

---
